# Supplementary figures and images for: Shared Neurodevelopmental Perturbations Can Lead to Intellectual Disability in Individuals with Distinct Rare Chromosome Duplications
Source: MDPI journal article supplement (doi:10.3390/genes12050632), 2021-04-23

(Chr8:126,397,316-143,577,971)

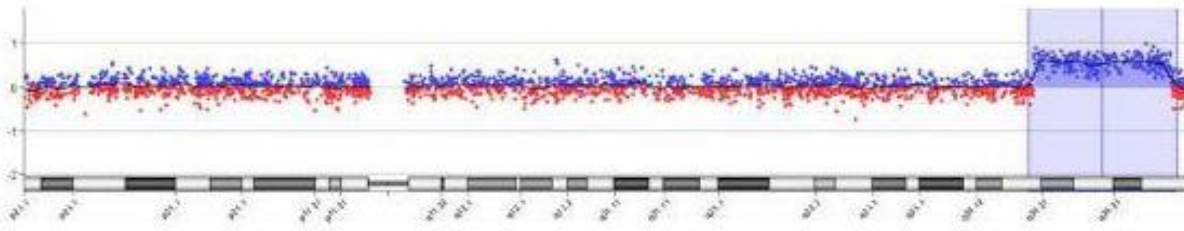

(Chr18:14,316-14,773,575)

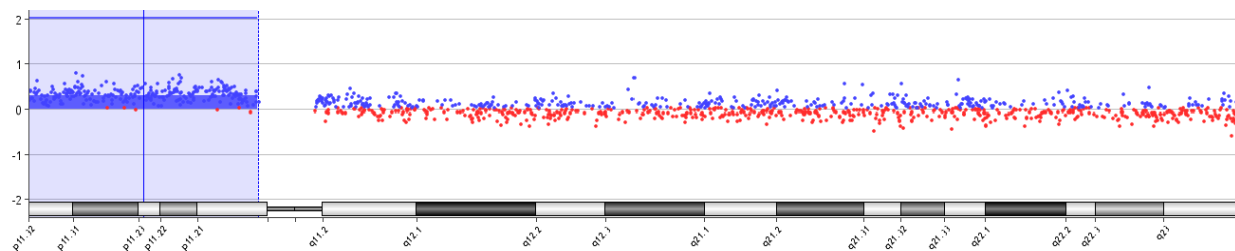

(Chrx:106,283,188-140,340,737)

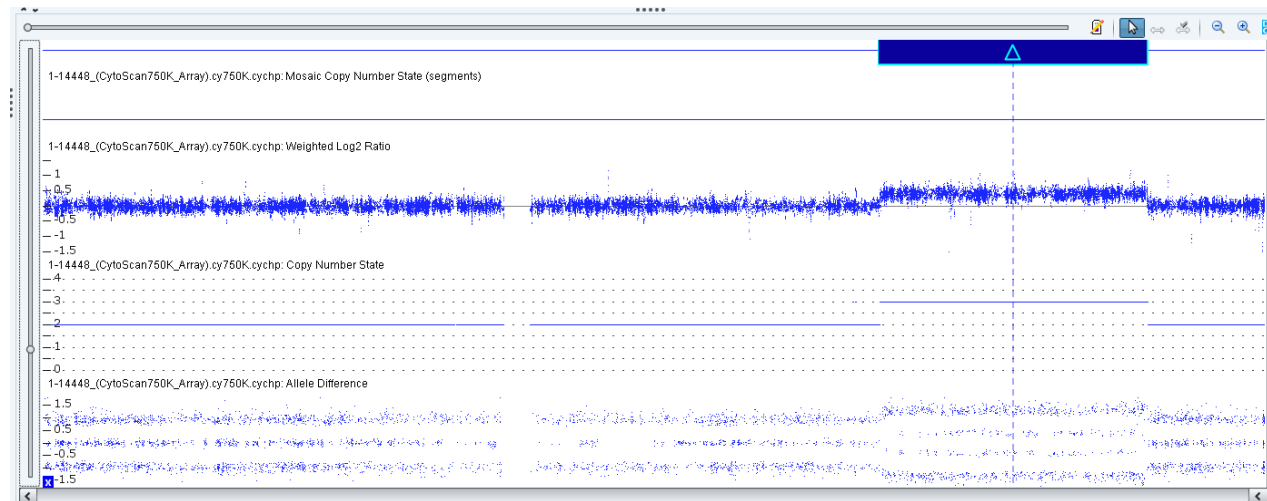

Supplement: s1 [file s1]
